# Supplementary material for: Non-Histone Lysine Crotonylation Is Involved in the Regulation of White Fat Browning
Source: MDPI journal article supplement (doi:10.3390/ijms232112733), 2022-10-22
Supplement: s1 [file s1]

Appendix: additional image and table

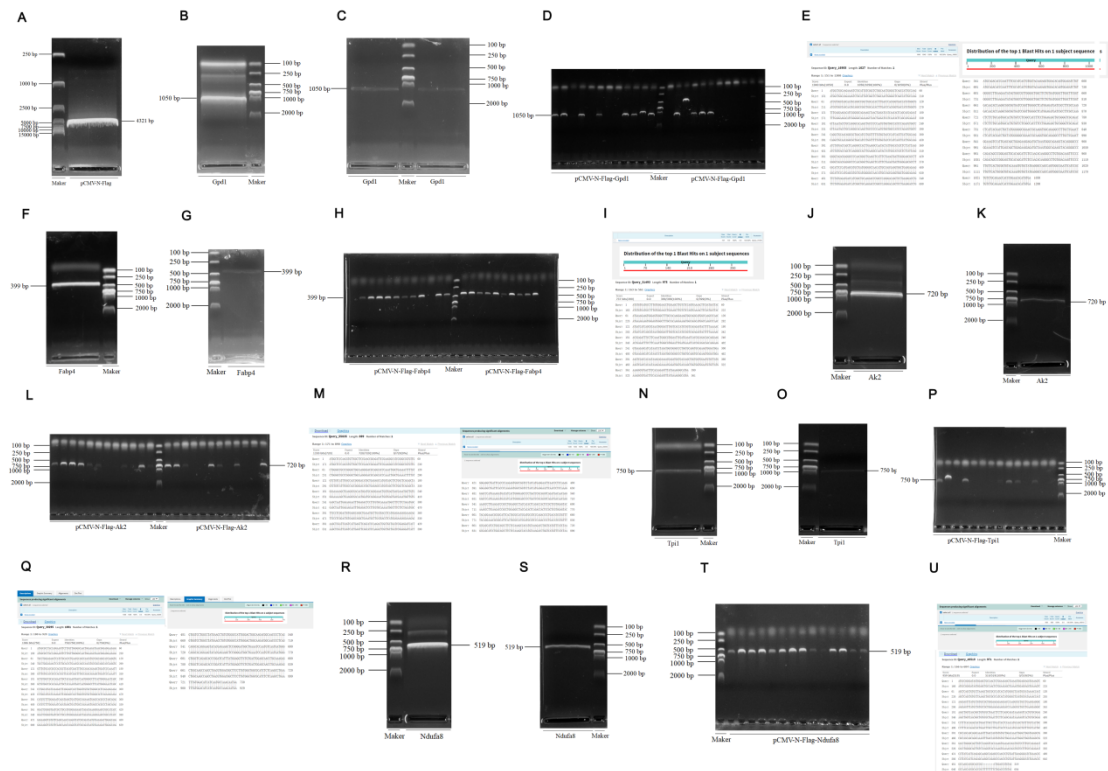

Figure S1 Construction of overexpression vector for related target genes

Note: A: The pCMV-N-Flag overexpression vector was recovered by double-enzyme digestion and purified gel; B-E: Construction and sequencing verification of pCMV-N-Flag-Gpd1 overexpression vector; F-I: Construction and sequencing verification of pCMV-N-Flag-Fabp4 overexpression vector; J-M: Constructio quencing verification of pCMV-N-Flag-Ak2 overexpression vector; N-Q: Construction and sequencing verification of pCMV-N-Flag-Tpi1 overexpression vector; R-U: Construction and sequencing verification of pCMV-N-Flag-Ndufa8 overexpression vector.

Table S1 Identification of normalized modification Kcr sites quantitation on non-histone proteins in CL mice

| Protein accession | Protein description                                      | Gene name | Regulate d Type | Amino acid | Kcr sites | Normalized modification sites quantitation |
|-------------------|----------------------------------------------------------|-----------|-----------------|------------|-----------|--------------------------------------------|
|                   |                                                          |           |                 |            |           | Kcr Ratio(CL/WT)                           |
| P13707            | Glycerol-3-phosphate dehydrogenase [NAD(+)], cytoplasmic | GPD1      | Down            | K          | 130       | 0.5626703                                  |
| P13707            | Glycerol-3-phosphate dehydrogenase [NAD(+)], cytoplasmic | GPD1      | Down            | K          | 313       | 0.828175896                                |
| P13707            | Glycerol-3-phosphate dehydrogenase [NAD(+)], cytoplasmic | GPD1      | Down            | K          | 178       | 0.639287766                                |
| P04117            | Fatty acid-binding protein, adipocyte                    | FABP4     | Down            | K          | 97        | 0.570131639                                |

|        |                                                                    |        |    |   |     |                |
|--------|--------------------------------------------------------------------|--------|----|---|-----|----------------|
| Q9WTP6 | Adenylate kinase 2, mitochondrial                                  | AK2    | Up | K | 160 | 1.345023697    |
| P17751 | Triosephosphate isomerase                                          | TPI1   | Up | K | 238 | 2.08           |
| P17751 | Triosephosphate isomerase                                          | TPI1   | Up | K | 210 | 1.528880866    |
| P17751 | Triosephosphate isomerase                                          | TPI1   | Up | K | 199 | 2.01.396915584 |
| P17751 | Triosephosphate isomerase                                          | TPI1   | Up | K | 56  | 1.50371471     |
| Q9DCJ5 | NADH dehydrogenase<br>[ubiquinone] 1 alpha subcomplex<br>subunit 8 | NDUFA8 | Up | K | 159 | 1.749373434    |
| Q9DCJ5 | NADH dehydrogenase<br>[ubiquinone] 1 alpha subcomplex<br>subunit 8 | NDUFA8 | Up | K | 162 | 1.922965116    |
| Q9DCJ5 | NADH dehydrogenase<br>[ubiquinone] 1 alpha subcomplex<br>subunit 8 | NDUFA8 | Up | K | 132 | 1.441558442    |
| Q9DCJ5 | NADH dehydrogenase<br>[ubiquinone] 1 alpha subcomplex<br>subunit 8 | NDUFA8 | Up | K | 41  | 1.593824228    |
